# Supplementary material for: Association between Post-acute Sequelae of SARS-CoV-2 and Physical Inactivity: A Cohort Study of 614 COVID-19 survivors
Source: Research Square preprint supplement (doi:10.21203/rs.3.rs-1638885/v1), 2022-05-23
Supplement: Supplementary file 1 [file f57b4945bd249e9a3349911b.docx]

SUPPLEMENTARY MATERIAL

**Figures and legends**

Figure S1. Direct acyclic graph of the association between post-acute sequelae of SARS-CoV-2 (PASC) and physical activity level. BMI = body mass index.

Figure S2. Multivariate-adjusted logistic regression analyses (odds ratio [(95% CI]) of the association between persistent symptoms related to COVID-19 (memory impairments, depression, anxiety, taste and smell loss) with physical inactivity (<150 min/week of moderate-to-vigorous activity). * Indicates P<0.05.

**Figure S1**


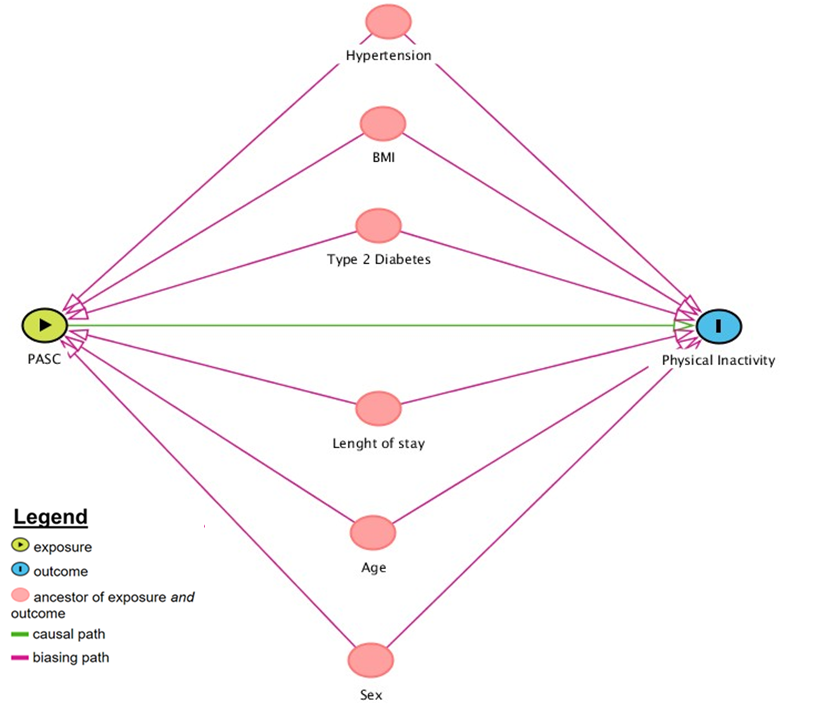


**Figure S2**
